# Supplementary material for: Continuous-flow microfluidic blood cell sorting for unprocessed whole blood using surface-micromachined microfiltration membranes
Source: Royal Society of Chemistry journal article supplement (doi:10.1039/c4lc00350k), 2014-01-01
Supplement: c4lc00350k1.pdf [file c4lc00350k1.pdf]

## SUPPLEMENTARY MATERIALS

### **Continuous-flow microfluidic blood cell sorting for unprocessed whole blood using surface-micromachined microfiltration membranes**

Xiang Li<sup>a,b</sup>, Weiqiang Chen<sup>a,b</sup>, Guangyu Liu<sup>b</sup>, Wei Lu<sup>b</sup> and Jianping Fu<sup>a,b,c,\*</sup>

<sup>a</sup>Integrated Biosystems and Biomechanics Laboratory, University of Michigan, Ann Arbor,  
Michigan 48109, USA; <sup>b</sup>Department of Mechanical Engineering, University of Michigan, Ann  
Arbor, Michigan 48109, USA; <sup>c</sup>Department of Biomedical Engineering, University of Michigan,  
Ann Arbor, Michigan 48109, USA.

\*Corresponding author (Email: jpfu@umich.edu)

## SUPPLEMENTARY FIGURE

Figure S1

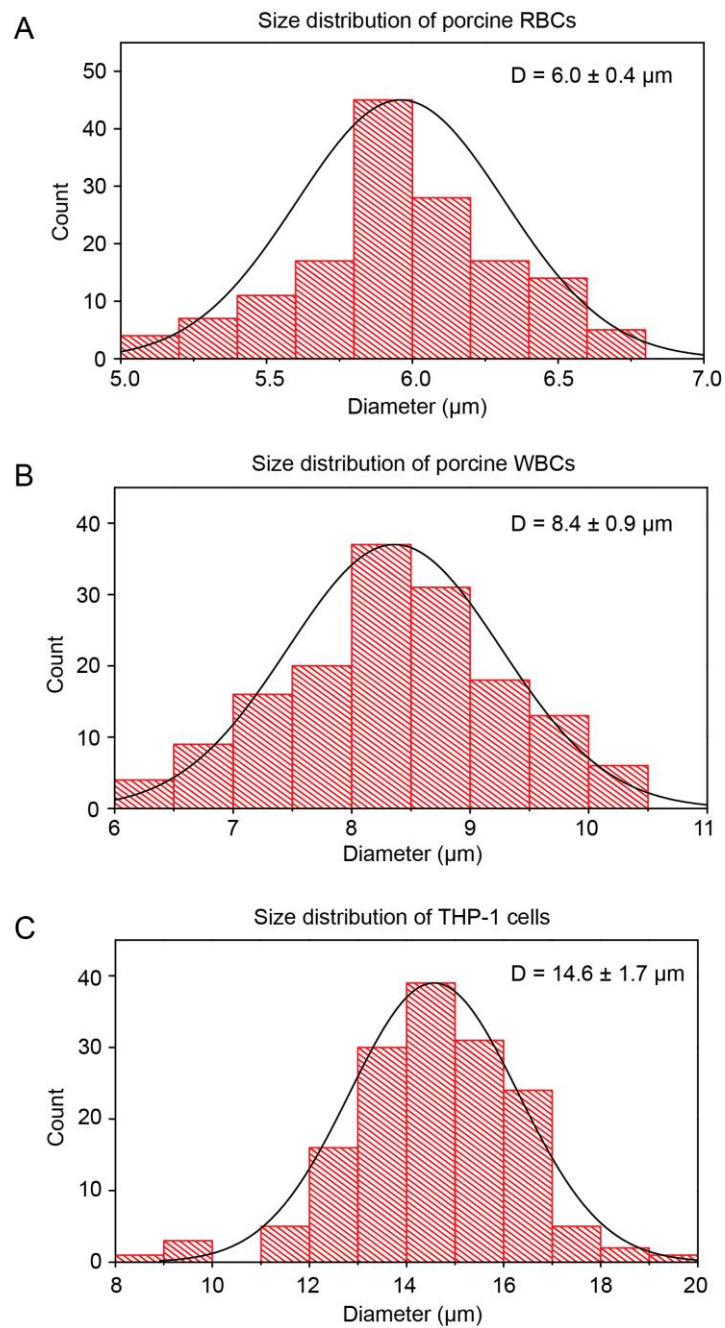

Figure S1. Size distributions of RBCs (A), WBCs (B), and THP-1 cells (C).
